# Supplementary material for: Electronic structures of intermolecular hydrogen bond contacts with solute in aqueous solution: glycine as a working prototype
Source: Royal Society of Chemistry journal article supplement (doi:10.1039/c5cp07968c), 2016-01-01
Supplement: c5cp07968c1.pdf [file c5cp07968c1.pdf]

**Supporting Information for:**

**Electronic Structures of Intermolecular Hydrogen Bond Contacts on Solute in  
Aqueous Solution: Glycine as a Working Prototype**

Lingbiao Meng,<sup>a,b,\*</sup> Weidong Wu<sup>a,c</sup> and Zijing Lin,<sup>b,\*</sup>

<sup>a</sup>Research Center of Laser Fusion, China Academy of Engineering Physics, Mianyang  
621900, China

<sup>b</sup>Hefei National Laboratory for Physical Sciences at Microscale and Department of Phys-  
ics, University of Science and Technology of China, Hefei 230026, China

<sup>c</sup>IFSA Collaborative Innovation Center, Shanghai Jiao Tong University, Shanghai 200240,  
China

**Table of Contents**

|                                                                              |     |
|------------------------------------------------------------------------------|-----|
| I. Computational details.....                                                | S2  |
| II. Tables: Structures and IR frequencies of relevant modeling clusters..... | S3  |
| IV. References.....                                                          | S10 |

## I. Computational details

The geometrical and vibrational features of all modeling clusters were investigated by the density functional theory (DFT) calculations. The hybrid functional of BHandHLY<sup>1</sup> is used since the functional has been shown to be accurately describing the amino acid systems that are rich in H-bonds.<sup>2</sup> The 6-31++G(d,p) basis set is used in most cases, but the 6-31++G(d) basis set may also be selected for better comparability with the literature studies.<sup>3-5</sup> The BHandHLYP vibrational frequencies are scaled by a uniform factor of 0.92 in order to account for the anharmonicity effect and be comparable with the experimental data, as suggested in the literatures.<sup>6-8</sup>

To test the basis set dependence of the computational results, two additional basis sets, 6-311++G\* and 6-311++G\*\* have been used. The differences in the structural parameters and relative energies obtained by different basis sets are small. For example, corresponding to Figure 4 in the main text, Figure S1 illustrates the uncertainty for the computed effective energies and potentials. The bars for the numerical uncertainty refer to the difference between the 6-31++G\* results and the averages of the three basis sets of 6-31++G\*\*, 6-311++G\* and 6-311++G\*\*. It is clear from Figure S1 that the numerical uncertainty is negligible for the energy scale of interest. The numerical uncertainties for the interested IR modes are also small, but not negligible. They are indicated in Figure 3 of the main text.

All calculations reported here were performed using the Gaussian 03/09 suite of programs.<sup>9,10</sup>

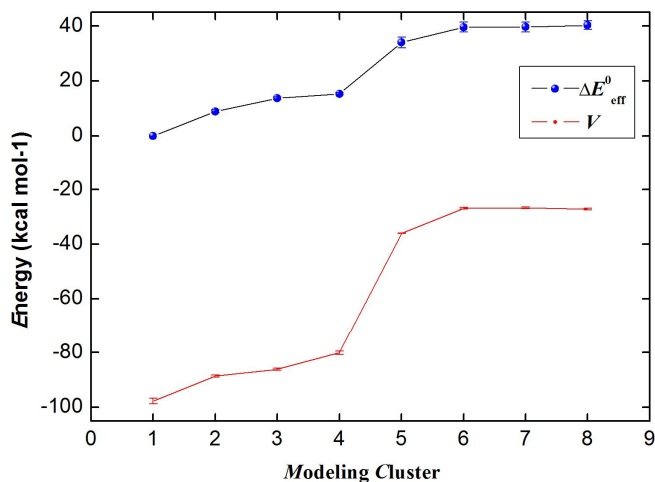

**FIG. S1.** The basis set dependence of the relative effective energies and potentials of modeling clusters. Fig. S1 corresponds to Figure 4 of the main text. More description may be found in the main manuscript.

## II. Tables : Structures and IR frequencies of relevant modeling clusters

### Table Overview:

Table S1 is used to support the H-bond models of  $\Pi_1(\text{H})$ ,  $\Pi_3(\text{N})$ , and  $\Pi_2(\text{O})$  discussed in the main text.

Table S2 supports the detailed discussion on  $\Pi_2(\text{O})$  of Figure 3 in the main text.

Table S3 and S4 are the basis for the discussion on  $z\text{Gly}$  clusters in the main text.

Table S5 provides the testing results for phenylalanine and alanine in aqueous solution.

**Table S1:** Structures and characteristic IR frequencies of representative modeling clusters,  $d\text{GlyW}_n$ ,  $p\text{GlyW}_n$ . Frequencies ( $\text{cm}^{-1}$ ) are calculated at the BHandHLYP/6-31++G(d,p) level.  $\nu_{\text{ad}}(\text{NH}_3^+)$  and  $\nu_{\text{sd}}(\text{NH}_3^+)$  denote the  $\text{NH}_3^+$  asymmetric and symmetric deformations,  $\nu_{\text{sc}}(\text{NH}_2)$  denotes the  $\text{NH}_2$  scissor, and  $\nu(\text{C}=\text{O})$  and  $\nu(\text{C}-\text{O}(\text{H}))$  denote the  $\text{C}=\text{O}$  and  $\text{C}-\text{O}(\text{H})$  stretching vibrations, respectively. The experiment data are from Refs [11,12]. Note that due to the sensitivity of the N-H vibrations to the H-bond arrangement, the most satisfying agreement between the theory and experiment is found in clusters with a second hydration shell.

| Geometries                                                                          | Parameters (Degree)                                                                                                                                                                                                                 | Frequencies                                                                  |
|-------------------------------------------------------------------------------------|-------------------------------------------------------------------------------------------------------------------------------------------------------------------------------------------------------------------------------------|------------------------------------------------------------------------------|
| 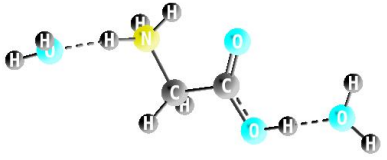  | $p\text{GlyW}_2 \rightarrow \Pi_1(\text{H})$ :<br>$\angle(\text{O}-\text{H}\cdots\text{O}_\text{W})=179$<br>$\angle(\text{N}-\text{H}\cdots\text{O}_\text{W})=173$                                                                  |                                                                              |
|  | $d\text{GlyW}_1 \rightarrow \Pi_3(\text{N})$ :<br>$\angle(\text{C}-\text{N}\cdots\text{H}_\text{W})=116$<br>$\angle(\text{H}-\text{N}\cdots\text{H}_\text{W})=109,114$                                                              |                                                                              |
|  | $p\text{GlyW}_9 \rightarrow \Pi_2(\text{O})$ :<br>$\angle(\text{C}-\text{O}\cdots\text{H}_\text{W})=124$<br>$\angle(\text{H}-\text{O}\cdots\text{H}_\text{W})=123$<br>$\Phi[\text{H}-\text{O}-\text{C}\cdots\text{H}_\text{W}]=165$ | $\nu(\text{C}-\text{O}(\text{H}))_{\text{calc}}=1257, \text{exp.} \sim 1258$ |

|                                                                                   |                                                                                                                                                                                                                                                                                                      |                                                                                                                                                                                                                                                                                                                    |
|-----------------------------------------------------------------------------------|------------------------------------------------------------------------------------------------------------------------------------------------------------------------------------------------------------------------------------------------------------------------------------------------------|--------------------------------------------------------------------------------------------------------------------------------------------------------------------------------------------------------------------------------------------------------------------------------------------------------------------|
| 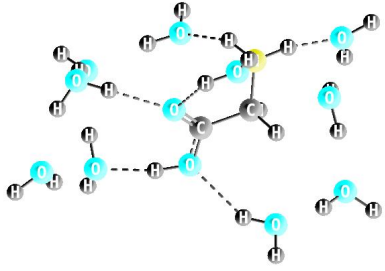 | <p><i>p</i>GlyW<sub>10</sub> → Π<sub>1</sub>(H)Π<sub>2</sub>(O)</p> <p>∠(N-H<sub>3</sub>⋯O<sub>W</sub>)=167,163,151<br/> ∠(O-H⋯O<sub>W</sub>)=162<br/> ∠(C=O⋯H<sub>W</sub>)=120,154<br/> Φ[H<sub>W</sub>⋯O=C⋯H<sub>W</sub>]=175<br/> ∠(C-(H)O⋯H<sub>W</sub>)=114<br/> Φ[H-O-C⋯H<sub>W</sub>]=145</p> | <p><math>\nu_{\text{ad}}(\text{NH}_3^+)_{\text{calc}}=1617/1631</math>, exp. ~ 1615<br/> <math>\nu_{\text{sd}}(\text{NH}_3^+)_{\text{calc}}=1511</math>, exp. ~ 1512/1521<br/> <math>\nu(\text{C=O})_{\text{calc}}=1745</math>, exp. ~1740<br/> <math>\nu(\text{C-O(H)})_{\text{calc}}=1245</math>, exp. ~1258</p> |
|  | <p><i>d</i>GlyW<sub>11</sub> → Π<sub>1</sub>(H)Π<sub>3</sub>(N)Π<sub>2</sub>(O)</p> <p>∠(N-H<sub>2</sub>⋯O<sub>W</sub>)=149,146<br/> ∠(C-N⋯H<sub>W</sub>)=121<br/> ∠(C=O⋯H<sub>W</sub>)=119,124,132,144<br/> Φ[H<sub>W</sub>⋯O=C⋯H<sub>W</sub>]= 172,158</p>                                         | <p><math>\nu_{\text{sc}}(\text{NH}_2)_{\text{calc}} \sim 1588</math>, exp. ~1590-1600<br/> <math>\nu_{\text{asym}}(\text{CO}_2^-)_{\text{calc}}=1567</math>, exp. ~1561<br/> <math>\nu_{\text{sym}}(\text{CO}_2^-)_{\text{calc}}=1409</math>, exp. ~1404</p>                                                       |

**Table S2:** Structures and characteristic IR frequencies of representative modeling clusters,  $d\text{GlyW}_n$ , for deprotonated (anionic) Gly. Frequencies ( $\text{cm}^{-1}$ ) are calculated at the BHandHLYP/6-31++G(d,p) level.  $\nu_{\text{as}}(\text{CO}_2^-)$  and  $\nu_{\text{ss}}(\text{CO}_2^-)$  denote the  $\text{CO}_2^-$  asymmetric and symmetric stretching vibrations, respectively. Band gaps in the Table refers the differences in  $\nu_{\text{as}}(\text{CO}_2^-)$  and  $\nu_{\text{ss}}(\text{CO}_2^-)$ ; The structure of  $d\text{GlyW}_{4d}$  is from Ref [13]; The experiment data are taken from Ref [11].

| Clusters            | Geometries                                                                          | Frequencies                      |                                  |          |
|---------------------|-------------------------------------------------------------------------------------|----------------------------------|----------------------------------|----------|
|                     |                                                                                     | $\nu_{\text{as}}(\text{CO}_2^-)$ | $\nu_{\text{ss}}(\text{CO}_2^-)$ | Band gap |
| $d\text{GlyW}_0$    | 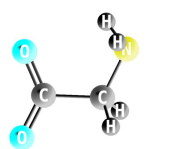   | 1619                             | 1351                             | 268      |
| $d\text{GlyW}_{1a}$ |    | 1600                             | 1369                             | 231      |
| $d\text{GlyW}_{1b}$ |   | 1616                             | 1355                             | 260      |
| $d\text{GlyW}_{1c}$ |  | 1605                             | 1349                             | 257      |
| $d\text{GlyW}_{2a}$ |  | 1599                             | 1383                             | 216      |
| $d\text{GlyW}_{2b}$ |  | 1583                             | 1370                             | 213      |

|                             |                                                                                     |      |      |     |
|-----------------------------|-------------------------------------------------------------------------------------|------|------|-----|
| <i>d</i> GlyW <sub>3a</sub> | 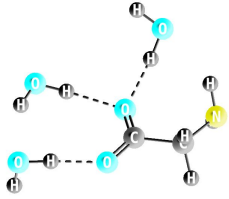   | 1385 | 1386 | 200 |
| <i>d</i> GlyW <sub>3b</sub> |    | 1576 | 1386 | 190 |
| <i>d</i> GlyW <sub>4a</sub> |    | 1578 | 1392 | 186 |
| <i>d</i> GlyW <sub>4b</sub> |   | 1574 | 1393 | 181 |
| <i>d</i> GlyW <sub>4c</sub> |  | 1574 | 1387 | 187 |
| <i>d</i> GlyW <sub>4d</sub> |  | 1575 | 1381 | 194 |
| <i>d</i> GlyW <sub>5</sub>  |  | 1579 | 1409 | 170 |

|                            |                                                                                   |      |      |     |
|----------------------------|-----------------------------------------------------------------------------------|------|------|-----|
| <i>d</i> GlyW <sub>6</sub> | 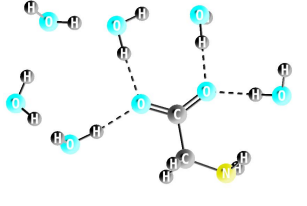 | 1573 | 1410 | 163 |
| Exp.                       |                                                                                   | 1561 | 1404 | 157 |

**Table S3:** IR frequencies (freq) and intensities (inten) for  $z\text{GlyW}_8$  of Fig. 2 of the main text. Frequencies ( $\text{cm}^{-1}$ ) are calculated at the BHandHLYP/6-31++G(d) level. Only frequencies in the range of  $1300\text{--}1700\text{ cm}^{-1}$  that are relevant to the  $\text{CO}_2^-$  vibrations are shown here. The experiment data are from refs [3,11].

| Theory |       |                                                                   | Exp.      |
|--------|-------|-------------------------------------------------------------------|-----------|
| freq   | inten | Assignment                                                        |           |
| 1667   | 56    | $\text{NH}_3$ ad. + $\text{H}_2\text{O}$ bend + $\text{CO}_2$ as. |           |
| 1660   | 43    | $\text{NH}_3$ ad. + $\text{H}_2\text{O}$ bend + $\text{CO}_2$ as. |           |
| 1639   | 258   | $\text{NH}_3$ ad. + $\text{CO}_2$ as. + $\text{H}_2\text{O}$ bend | 1637      |
| 1623   | 61    | $\text{CO}_2$ as. + $\text{NH}_3$ ad. + $\text{H}_2\text{O}$ bend |           |
| 1583   | 528   | $\text{CO}_2$ as. + $\text{H}_2\text{O}$ bend                     | 1598/1599 |
| 1545   | 135   | $\text{NH}_3$ sd + $\text{H}_2\text{O}$ bend                      | 1510      |
| 1433   | 13    | $\text{CO}_2$ ss. + $\text{CH}_2$ sc.                             |           |
| 1412   | 118   | $\text{CO}_2$ ss. + $\text{CH}_2$ sc.                             | 1412/1413 |
| 1329   | 108   | $\text{CH}_2$ r. + $\text{CO}_2$ ss.                              | 1331      |

**Table S4:** Relative cluster total energies ( $E_{\text{tot}}$ ), solute energies ( $E_{\text{eff}}$ ) and solute-solvent interaction energies ( $V_{\text{GW}}$ ) of model clusters of  $z\text{Gly}$  and  $n\text{Gly}$ . All energies are in kcal/mol and calculated at the BHandHLYP/6-31++G(d,p) level with the BSSE corrections. The structure of  $z\text{GlyW}_8$  ( $z1$ ) is obtained through our proposed H-bond model. The structure of reference modeling clusters,  $8Z\text{-c}$ ,  $8Z\text{-a}$ ,  $8Z\text{-e}$ ,  $8N8\text{-a}$ ,  $8N1\text{-a}$ ,  $8N6\text{-a}$ , and  $8N1\text{-d}$ , are from Ref [14].

| No.  | Clusters             | $E_{\text{tot}}$ | $E_{\text{eff}}$ | $V_{\text{GW}}$ |
|------|----------------------|------------------|------------------|-----------------|
| $z1$ | $z\text{GlyW}_8(z1)$ | 0.0              | 0.0              | -97.7           |
| $z2$ | $8Z\text{-c}$        | -4.7             | 8.9              | -88.6           |
| $z3$ | $8Z\text{-a}$        | -6.0             | 13.7             | -86.2           |
| $z4$ | $8Z\text{-e}$        | -5.3             | 15.3             | -80.1           |
| $c1$ | $8N8\text{-a}$       | -7.4             | 34.3             | -36.5           |
| $c2$ | $8N1\text{-a}$       | -6.0             | 39.6             | -26.9           |
| $c3$ | $8N6\text{-a}$       | -6.5             | 40.3             | -27.2           |
| $c4$ | $8N1\text{-d}$       | -5.5             | 39.7             | -26.7           |



**Table S5:** Testing results for the proposed  $\Pi_2(\text{O})$  state of solvated phenylalanine and alanine. The experiment data are from Refs [15,16].

| Phenylalanine                                                                                                                                         |                                      |                                      | Alanine                                                                                                                                               |                                      |                                      |
|-------------------------------------------------------------------------------------------------------------------------------------------------------|--------------------------------------|--------------------------------------|-------------------------------------------------------------------------------------------------------------------------------------------------------|--------------------------------------|--------------------------------------|
| 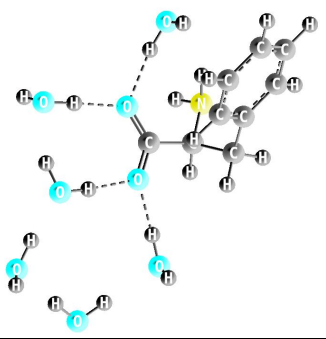                                                                     |                                      |                                      |                                                                     |                                      |                                      |
| $\angle(\text{C}=\text{O}\cdots\text{H}_\text{W})=123,126,127,130$<br>$\Phi[\text{H}_\text{W}\cdots\text{O}=\text{C}\cdots\text{H}_\text{W}]=161,157$ |                                      |                                      | $\angle(\text{C}=\text{O}\cdots\text{H}_\text{W})=124,125,131,132$<br>$\Phi[\text{H}_\text{W}\cdots\text{O}=\text{C}\cdots\text{H}_\text{W}]=171,168$ |                                      |                                      |
|                                                                                                                                                       | $\nu_{\text{as}}(\text{C}-\text{O})$ | $\nu_{\text{ss}}(\text{C}-\text{O})$ |                                                                                                                                                       | $\nu_{\text{as}}(\text{C}-\text{O})$ | $\nu_{\text{ss}}(\text{C}-\text{O})$ |
| <i>Theo.</i>                                                                                                                                          | 1563                                 | 1398                                 | <i>Theo.</i>                                                                                                                                          | 1571                                 | 1402                                 |
| <i>Exp.</i>                                                                                                                                           | 1560                                 | 1410                                 | <i>Exp.</i>                                                                                                                                           | ~1560                                | ~1410                                |

**Table S6:** Testing results for formamide in aqueous solution and in solid/liquid phase. The experiment data are from Refs [17-19].

| Formamide                                                                                                                                                                                                                       |       |              |               |                         |
|---------------------------------------------------------------------------------------------------------------------------------------------------------------------------------------------------------------------------------|-------|--------------|---------------|-------------------------|
| 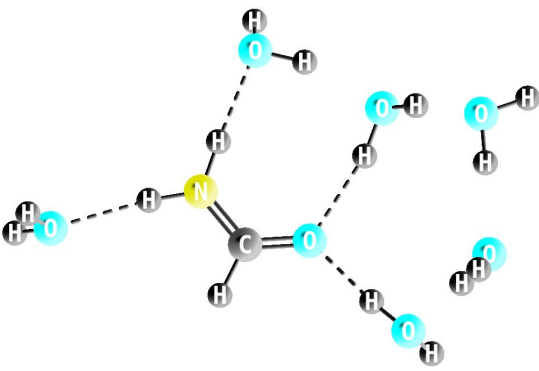                                                                                                                                            |       |              |               |                         |
| $\angle(\text{N}-\text{H}\cdots\text{O}_\text{W})=174^\circ, 173^\circ, \angle(\text{C}=\text{O}\cdots\text{H}_\text{W})=126^\circ, 128^\circ, \Phi[\text{H}_\text{W}\cdots\text{O}=\text{C}\cdots\text{H}_\text{W}]=157^\circ$ |       |              |               |                         |
| IR mode                                                                                                                                                                                                                         | Theo. | Exp.         |               |                         |
|                                                                                                                                                                                                                                 |       | <i>solid</i> | <i>liquid</i> | <i>Aqueous solution</i> |
| <i>Asym NH<sub>2</sub> stretch</i>                                                                                                                                                                                              | 3410  | 3372         |               |                         |
| <i>Sym NH<sub>2</sub> stretch</i>                                                                                                                                                                                               | 3176  | 3179         |               |                         |
| <i>CH stretch</i>                                                                                                                                                                                                               | 2894  | 2895         |               |                         |
| <i>CO stretch</i>                                                                                                                                                                                                               | 1685  | 1698         | 1682          | 1691                    |
| <i>NH<sub>2</sub> scissoring</i>                                                                                                                                                                                                | 1603  | 1628         |               |                         |
| <i>CH bending</i>                                                                                                                                                                                                               | 1360  | 1386         |               |                         |
| <i>CN stretch</i>                                                                                                                                                                                                               | 1312  | 1334         |               |                         |

### III. References

- (1) See the manual of ref 9 for the half-and-half functional implemented in Gaussian03.
- (2) Yu, W. B.; Liang, L.; Lin, Z. J.; Ling, S. L.; Haranczyk, M.; Gutowski, M. *J. Comput. Chem.* **2009**, *30*, 589.
- (3) Derbel, N.; Hernández, B.; Pflüger, F.; Liquier, J.; Geinguenaud, F.; Jaïdane, N.; Lakhdar, Z. B.; Ghomi, M. *J. Phys. Chem. B* **2007**, *111*, 1470.
- (4) Hernández, B.; Pflüger, F.; Nsangou, M.; Ghomi, M. *J. Phys. Chem. B* **2009**, *113*, 3169.
- (5) Hernández, B.; Pflüger, F.; Derbel, N.; Coninck, J. D.; Ghomi, M. *J. Phys. Chem. B* **2010**, *114*, 1077.
- (6) Scott, A.; Radom, L. *J. Phys. Chem.* **1996**, *100*, 16502.
- (7) Merrick, J.; Moran, D.; Radom, L. *J. Phys. Chem. A* **2007**, *111*, 11683.
- (8) Kuppens, T.; Vandyck, K.; Eycken, J.; Herrebout, W.; Veken, B.; Bultinck, P. *Spectrochimica Acta Part A* **2007**, *67*, 402.
- (9) Frisch, M. J.; Trucks, G. W.; Schlegel, H. B.; Scuseria, G. E.; Robb, M. A.; Cheeseman, J. R.; Montgomery, J. A., Jr.; Vreven, T.; Kudin, K. N.; Burant, J. C.; Millam, J. M.; Iyengar, S. S.; Tomasi, J.; Barone, V.; Mennucci, B.; Cossi, M.; Scalmani, G.; Rega, N.; Petersson, G. A.; Nakatsuji, H.; Hada, M.; Ehara, M.; Toyota, K.; Fukuda, R.; Hasegawa, J.; Ishida, M.; Nakajima, T.; Honda, Y.; Kitao, O.; Nakai, H.; Klene, M.; Li, X.; Knox, J. E.; Hratchian, H. P.; Cross, J. B.; Bakken, V.; Adamo, C.; Jaramillo, J.; Gomperts, R.; Stratmann, R. E.; Yazyev, O.; Austin, A. J.; Cammi, R.; Pomelli, C.; Ochterski, J. W.; Ayala, P. Y.; Morokuma, K.; Voth, G. A.; Salvador, P.; Dannenberg, J. J.; Zakrzewski, V. G.; Dapprich, S.; Daniels, A. D.; Strain, M. C.; Farkas, O.; Malick, D. K.; Rabuck, A. D.; Raghavachari, K.; Foresman, J. B.; Ortiz, J. V.; Cui, Q.; Baboul, A. G.; Clifford, S.; Cioslowski, J.; Stefanov, B. B.; Liu, G.; Liashenko, A.; Piskorz, P.; Komaromi, I.; Martin, R. L.; Fox, D. J.; Keith, T.; Al-Laham, M. A.; Peng, C. Y.; Nanayakkara, A.; Challacombe, M.; Gill, P. M. W.; Johnson, B.; Chen, W.; Wong, M. W.; Gonzalez, C.; and Pople, J. A. *Gaussian 03, Revision A.1*, Gaussian, Inc., Pittsburgh PA (2003).
- (10) Frisch, M. J.; Trucks, G. W.; Schlegel, H. B.; Scuseria, G. E.; Robb, M. A.; Cheeseman, J. R.; Scalmani, G.; Barone, V.; Mennucci, B.; Petersson, G. A.; Nakatsuji, H.; Caricato, M.; Li, X.; Hratchian, H. P.; Izmaylov, A. F.; Bloino, J.; Zheng, G.; Sonnenberg, J. L.; Hada, M.; Ehara, M.; Toyota, K.; Fukuda, R.; Hasegawa, J.; Ishida, M.; Nakajima, T.; Honda, Y.; Kitao, O.; Nakai, H.; Vreven, T.; Montgomery, J. A., Jr.; Peralta, J. E.; Ogliaro, F.; Bearpark, M.; Heyd, J. J.; Brothers, E.; Kudin, K. N.; Staroverov, V. N.; Kobayashi, R.; Normand, J.; Raghavachari, K.; Rendell, A.; Burant, J. C.; Iyengar, S. S.; Tomasi, J.; Cossi, M.; Rega, N.; Millam, N. J.; Klene, M.; Knox, J. E.; Cross, J. B.; Bakken, V.; Adamo, C.; Jaramillo, J.; Gomperts, R.; Stratmann, R. E.; Yazyev,

O.; Austin, A. J.; Cammi, R.; Pomelli, C.; Ochterski, J. W.; Martin, R. L.; Morokuma, K.; Zakrzewski, V. G.; Voth, G. A.; Salvador, P.; Dannenberg, J. J.; Dapprich, S.; Daniels, A. D.; Farkas, Ö.; Foresman, J. B.; Ortiz, J. V.; Cioslowski, J.; Fox, D. J. Gaussian 09, Revision D.01, Gaussian, Inc., Wallingford CT, 2009.

- (11) Max, J. J.; Trudel, M.; Chapados, C. *Appl. Spectrosc.* **1998**, *52*, 226.
- (12) Williams, R. W.; Kalasinsky, V. F.; Lowrey, A. H. *J. Mol. Struct.* **1993**, *281*, 157.
- (13) Lowrey, A. H.; Kalasinsky, V. F.; Williams, R. W. *Struct. Chem.* **1993**, *4*, 289.
- (14) Aikens, C. M.; Gordon, M. S. *J. Am. Chem. Soc.* **2006**, *128*, 12835.
- (15) Olsztynska, S.; Komorowska, M.; Vrielynck, L.; Dupuy, N. *Appl. Spect.* **2001**, *52*, 901.
- (16) Wolpert, M.; Hellwig, P. *Spectrochimica Acta Part A* **2006**, *64*, 987.
- (17) Torrie, B. H.; Brown, B. A. *J. Raman. Spect.* **1994**, *25*, 183.
- (18) Sivaraman, B.; Raja Sekhar, B. N.; Nair, B. G.; Hatode, V.; Mason, N. J. *Spectrochimica Acta Part A: Mol. Bio. Spect.* **2013**, *105*, 238.
- (19) Eaton, G.; Symons, M. C. R.; Rastogi, P. P.; *J. Chem. Soc., Faraday Trans. I*, **1989**, *85*, 3257.
